# Supplementary material for: Optical-switchable energy transfer controlled by multiple-responsive turn-on fluorescence via metal–ligand and host–guest interactions in diarylethene-based [2]pseudo-rotaxane polymers
Source: Royal Society of Chemistry journal article supplement (doi:10.1039/d0qm00605j), 2020-10-19
Supplement: d0qm00605j1.pdf [file d0qm00605j1.pdf]

## Supporting Information

# Optical-switchable energy transfer controlled by multiple-responsive turn-on fluorescence via metal-ligand and host-guest interactions in diarylethene-based [2]pseudo-rotaxane polymers

Ravinder Singh,<sup>a</sup> Chi-Chong Xiao,<sup>a</sup> Chong-Lun Wei,<sup>a</sup> Feng-Cheng Ho,<sup>a</sup> Trang Manh Khang,<sup>a</sup> Chinmayananda Gouda,<sup>a</sup> Tung-Kung Wu,<sup>b,c</sup> Yaw-Kuen Li,<sup>b,c</sup> Kung-Hwa Wei<sup>a,c</sup> and Hong-Cheu Lin<sup>\*a,c</sup>

<sup>a</sup> Department of Materials Science & Engineering, National Chiao Tung University, Hsinchu 300, Taiwan.

<sup>b</sup> Department of Biological Science & Technology, National Chiao Tung University, Hsinchu 300, Taiwan.

<sup>c</sup> Center for Emergent Functional Matter Science, National Chiao Tung University, Hsinchu 300, Taiwan.

\*E-mail: [linhc@mail.nctu.edu.tw](mailto:linhc@mail.nctu.edu.tw)

## List of contents:

|                                                              |       |              |
|--------------------------------------------------------------|-------|--------------|
| 1. Figs. S1 & S2                                             | ----- | page S3      |
| 2. Figs. S3 & S4                                             | ----- | page S4      |
| 3. Figs. S5 & S6                                             | ----- | page S5      |
| 4. Figs. S7 & S8                                             | ----- | page S6      |
| 5. Figs. S9 & S10                                            | ----- | page S7      |
| 6. Figs. S11 & S12                                           | ----- | page S8      |
| 7. Figs. S13 & S14                                           | ----- | page S9      |
| 8. Figs. S15 & S16                                           | ----- | page S10     |
| 9. NMR ( $^1\text{H}$ & $^{13}\text{C}$ ) (Figs. S17 to S26) | ----- | page S11-S20 |
| 10. HRMS (ESI data) (Figs. S27 to S32)                       | ----- | page S21-S26 |
| 11. EA data (Figs. S33 to S35)                               | ----- | page S27-S29 |

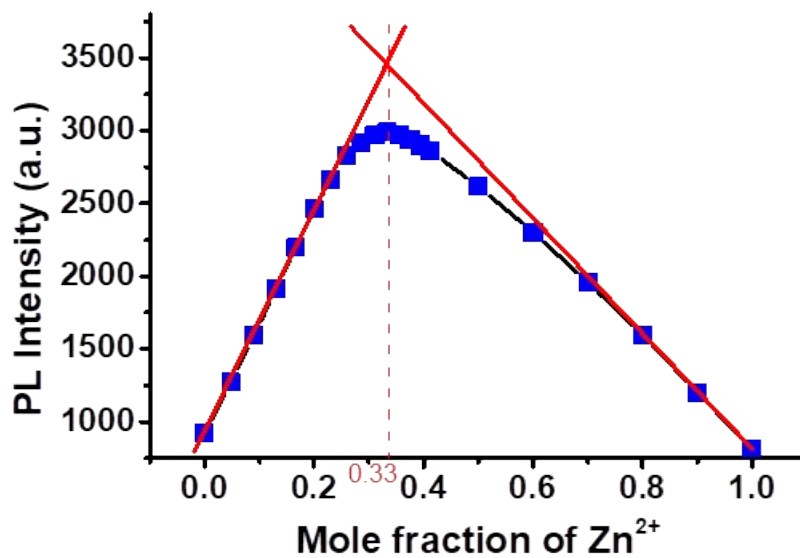

Fig. S1 Job's plot of metal-ligand complex Zn<sup>2+</sup>-TC<sub>2</sub> (1:2). ( $\lambda_{\text{exc}} = 300 \text{ nm}$  for PL exp.)

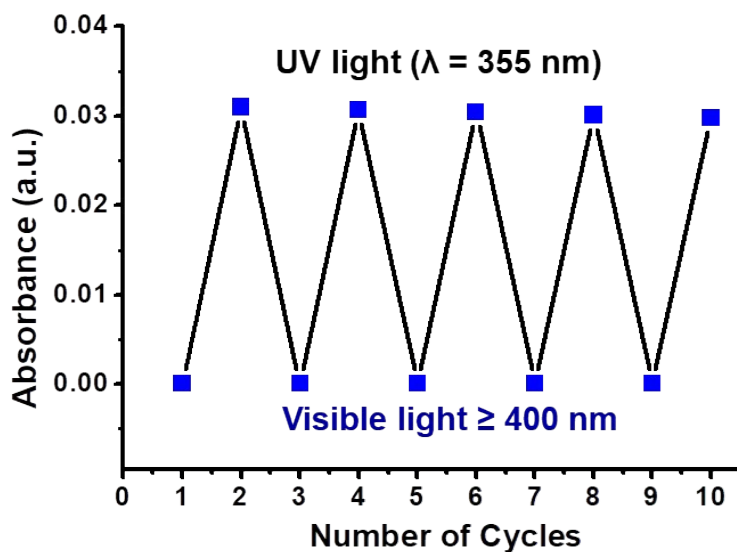

Fig. S2 Reversible absorption behavior between DS(O) and DS(C) at  $\lambda = 425 \text{ nm}$ .

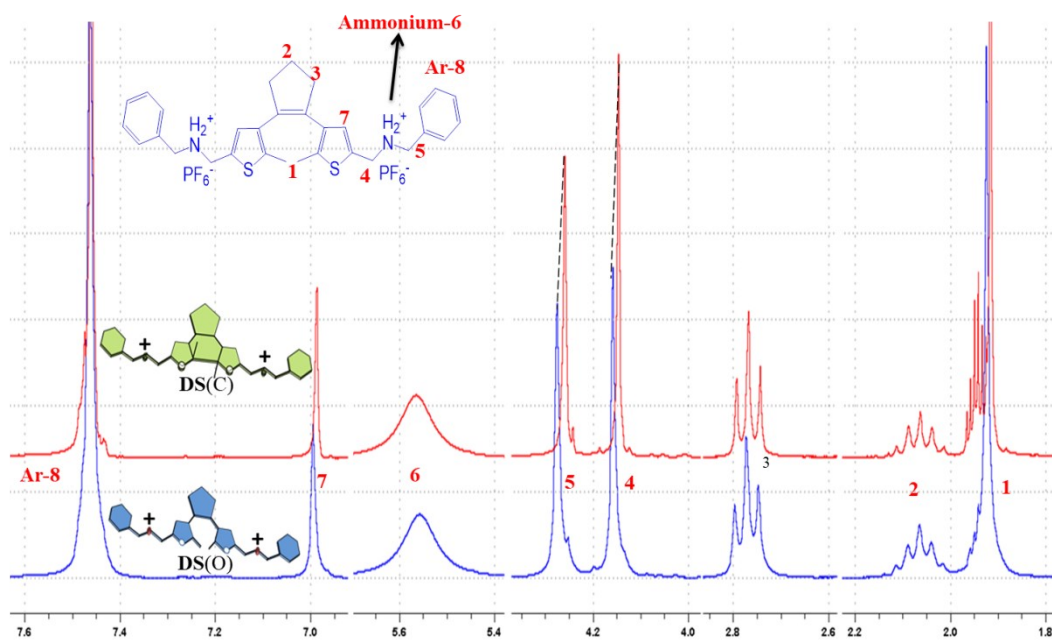

**Fig. S3** <sup>1</sup>H-NMR (300 MHz, CDCl<sub>3</sub>/CD<sub>3</sub>CN (1/1, v/v), 298K) of **DS** guest (6 mg in CHCl<sub>3</sub>/CH<sub>3</sub>CN (1/1, v/v)) before and after UV-irradiation (at λ = 355 nm for 15 min).

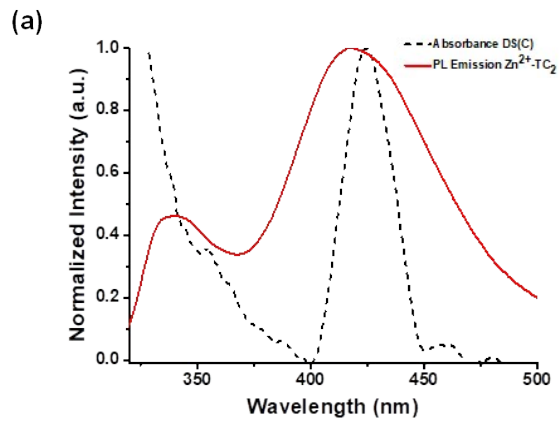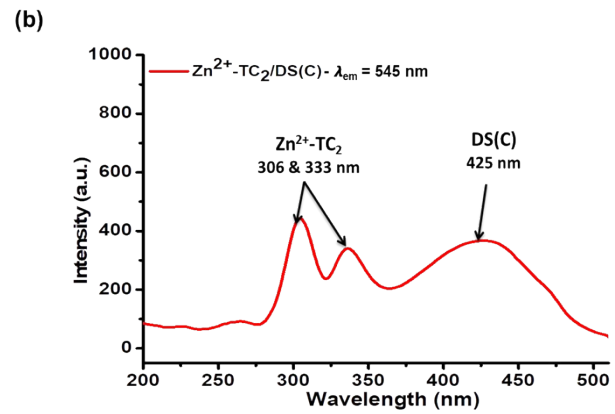

**Fig. S4** (a) Spectral overlaps of the emission of  $\text{Zn}^{2+}\text{-TC}_2$  host and absorption of **DS(C)** guest in  $\text{CHCl}_3/\text{CH}_3\text{CN}$  (1/1, v/v), ( $\lambda_{\text{ex}} = 300$  nm for PL exp.), (b) PL excitation spectrum of supramolecular polymer  $\text{Zn}^{2+}\text{-TC}_2/\text{DS(C)}$  in  $\text{CHCl}_3/\text{CH}_3\text{CN}$  (1/1, v/v) solution (1 mM) for emission at 545 nm.

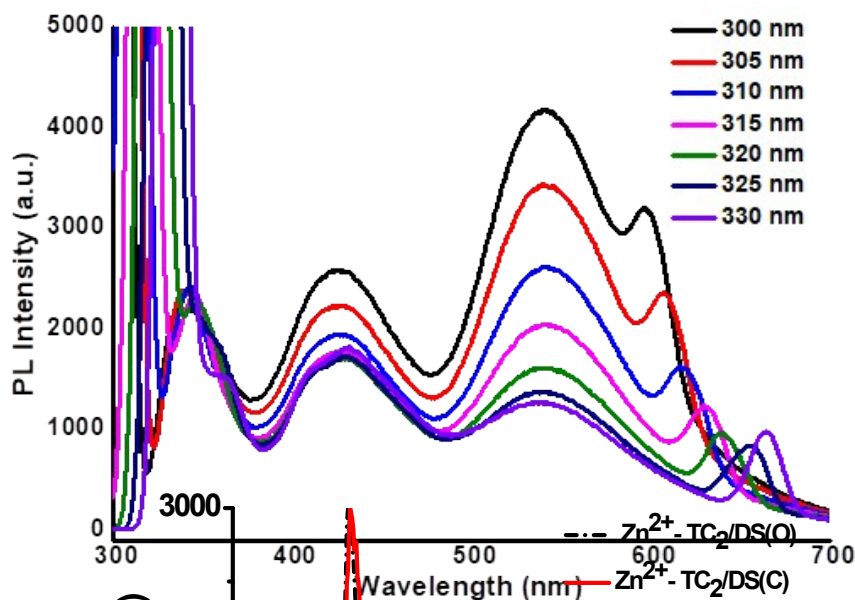

**Fig. S5** PL emission spectra of supramolecular polymer  $\text{Zn}^{2+}\text{-TC}_2/\text{DS(C)}$  in  $\text{CHCl}_3/\text{CH}_3\text{CN}$  (1/1, v/v) solutions (1 mM) at different excitation wavelengths from 300 nm to 330 nm. ( $\lambda_{\text{ex}} = 300$  nm.)

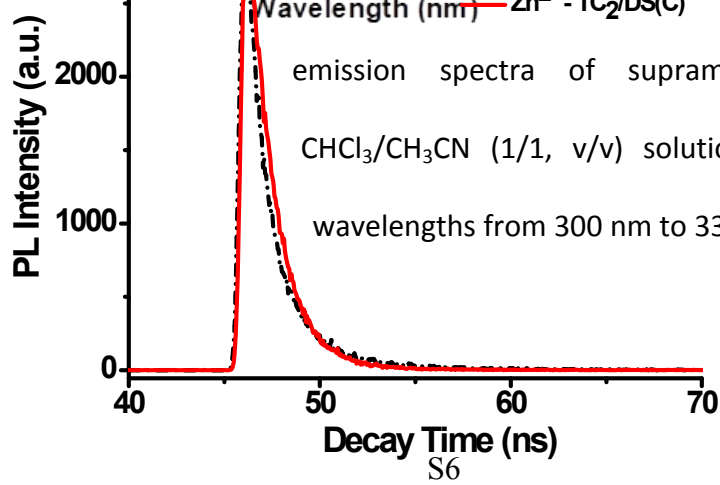

**Fig. S6** Time-resolved fluorescence measurement of  $\text{Zn}^{2+}\text{-TC}_2$  host emissions (at  $\lambda_{\text{max}} = 417 \text{ nm}$ ) in supramolecular polymer  $\text{Zn}^{2+}\text{-TC}_2/\text{DS}(\text{O} \ \& \ \text{C})$  in  $\text{CHCl}_3/\text{CH}_3\text{CN}$  (1/1, v/v) before and after UV-irradiation.

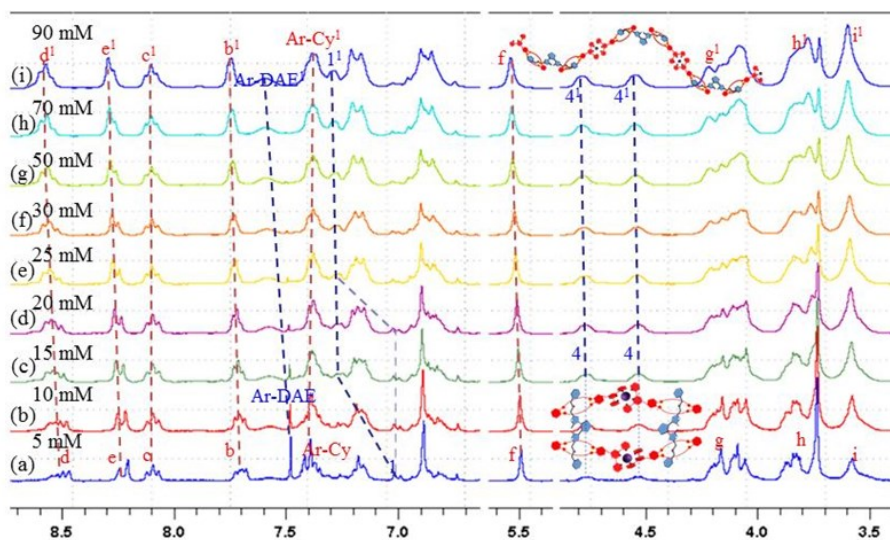

**Fig. S7**  $^1\text{H-NMR}$  spectra (300 MHz,  $\text{CDCl}_3/\text{CD}_3\text{CN}$  (1/1, v/v), 298K) of supramolecular polymer  $\text{Zn}^{2+}\text{-TC}_2/\text{DS}(\text{O})$  at various concentrations: (a) 5; (b) 10; (c) 15; (d) 20; (e) 25; (f) 30; (g) 50; (h) 70; (i) 90 mM.

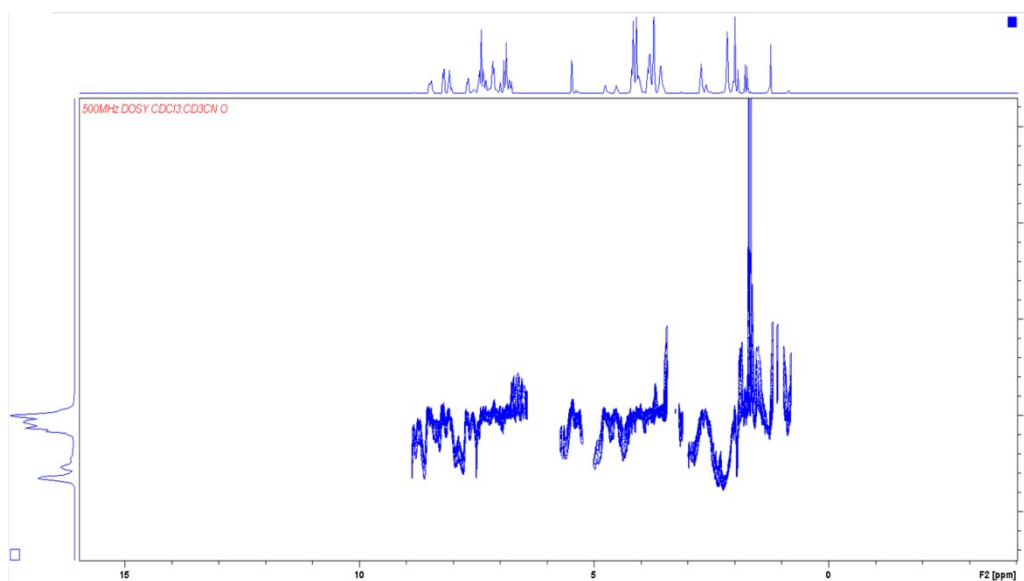

**Fig. S8** Two-dimensional diffusion-ordered NMR (DOSY) spectra (500 MHz,  $\text{CDCl}_3/\text{CD}_3\text{CN}$  (1/1, v/v), 298K) of supramolecular polymer  $\text{Zn}^{2+}\text{-TC}_2/\text{DS}(\text{O})$  at concentration 10 mM.

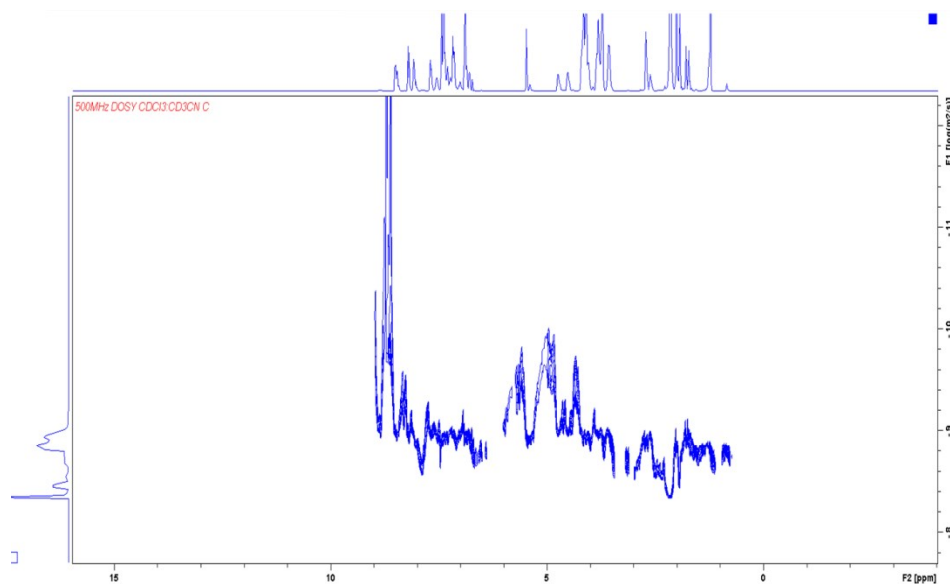

**Fig. S9** Two-dimensional diffusion-ordered NMR (DOSY) spectra (500 MHz,  $\text{CDCl}_3/\text{CD}_3\text{CN}$  (1/1, v/v), 298K) of supramolecular polymer  $\text{Zn}^{2+}\text{-TC}_2/\text{DS}(\text{C})$  at concentration 10 mM.



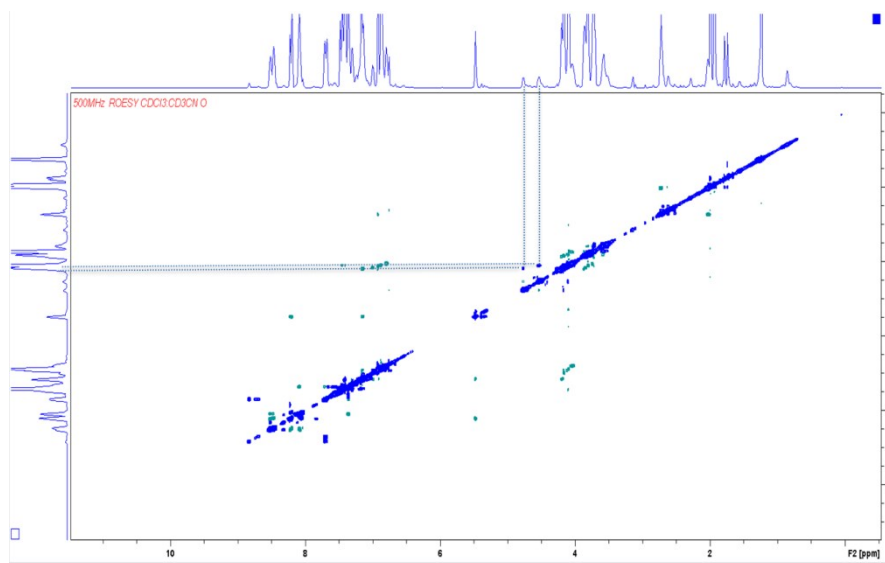

**Fig. S10** Rotating-frame nuclear overhauser effect NMR (ROESY) spectra (500 MHz,  $\text{CDCl}_3/\text{CD}_3\text{CN}$  (1/1, v/v), 298K) of supramolecular polymer  $\text{Zn}^{2+}\text{-TC}_2/\text{DS}(\text{O})$  at concentration 10 mM.

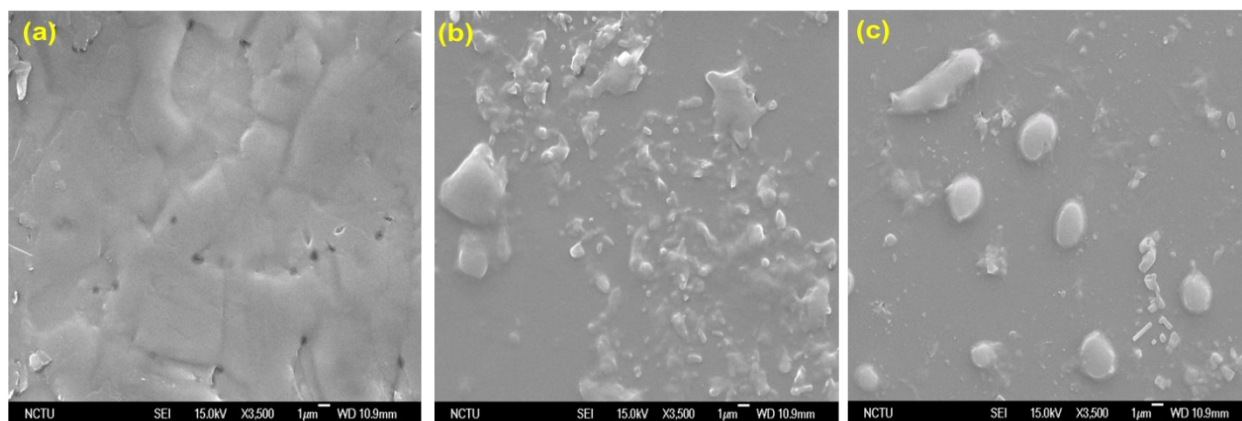

**Fig. S11** Morphological SEM images of (a) metal-coordinated  $\text{Zn}^{2+}\text{-TC}_2$  host along with supramolecular polymers (b)  $\text{Zn}^{2+}\text{-TC}_2/\text{DS}(\text{O})$  and (c)  $\text{Zn}^{2+}\text{-TC}_2/\text{DS}(\text{C})$  prepared from  $\text{CHCl}_3/\text{CH}_3\text{CN}$  (1/1, v/v) solutions (1 mM).

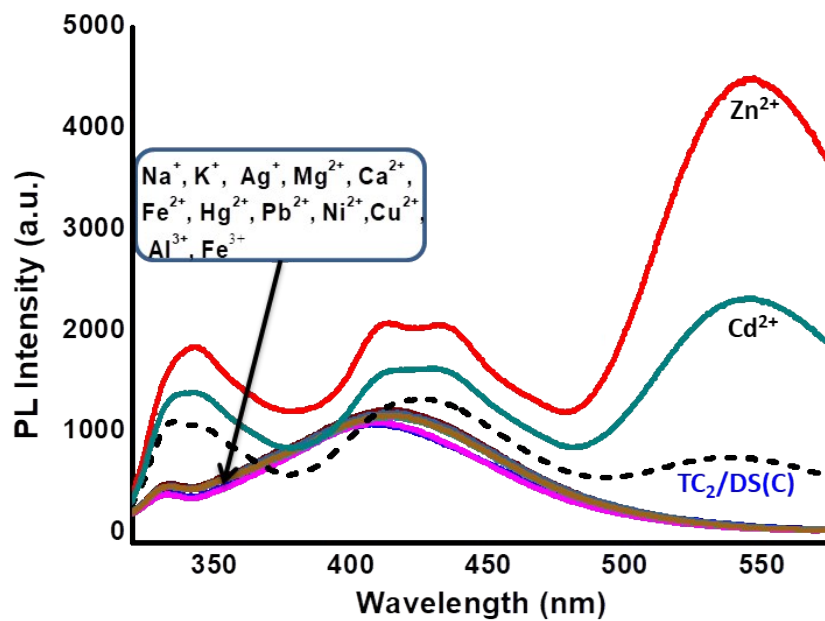

**Fig. S7** PL spectra of dis-metaled component  $TC_2/DS(C)$  in  $CHCl_3/CH_3CN$  (1/1, v/v) solutions (1 mM) after chelation with various metal ions (i.e., 0.5 equiv.). ( $\lambda_{exc} = 300$  nm.)

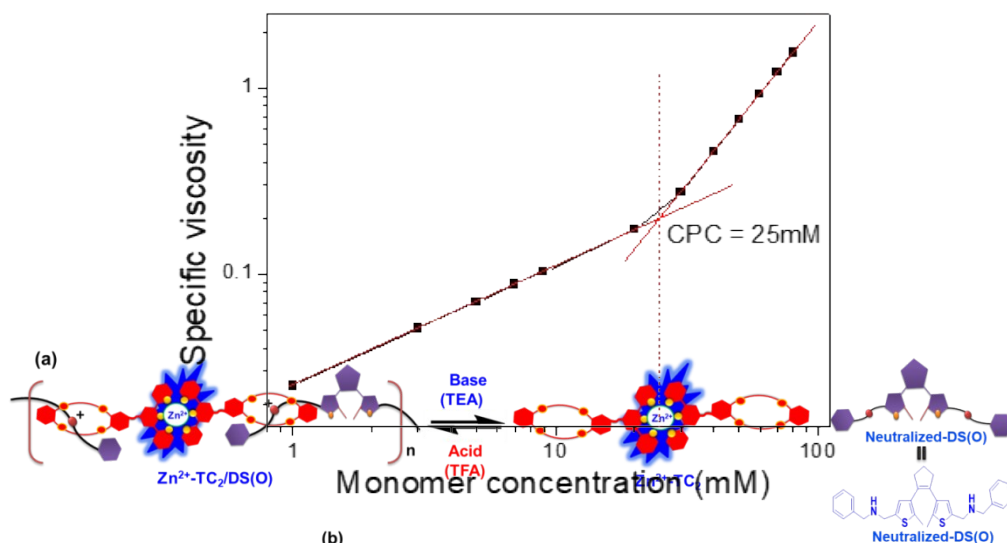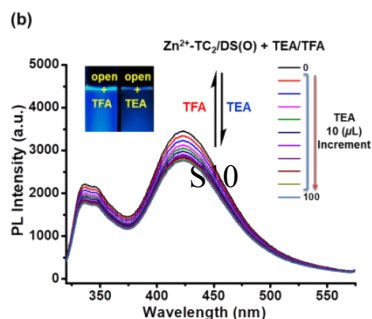

**Fig. S13** Specific viscosity

measurement of supramolecular

polymer  $\text{Zn}^{2+}\text{-TC}_2\text{/DS(O)}$  in  $\text{CHCl}_3\text{/CH}_3\text{CN}$  (1:1, v/v, 298 K).

**Fig. S14** (a) Pictorial demonstration of the dis-assembly/re-assembly in supramolecular polymer  $\text{Zn}^{2+}\text{-TC}_2\text{/DS(O)}$  (1:1) by means of interaction with base/acid in  $\text{CHCl}_3\text{/CH}_3\text{CN}$  (1/1, v/v). (b) PL spectral changes of  $\text{Zn}^{2+}\text{-TC}_2\text{/DS(O)}$  upon the addition of TEA (0 to 100  $\mu\text{L}$ ) and TFA (0 to 100  $\mu\text{L}$ ) in  $\text{CHCl}_3\text{/CH}_3\text{CN}$  (1/1, v/v). Insets: photoimages of  $\text{Zn}^{2+}\text{-TC}_2\text{/DS(O)}$  with acid/base in  $\text{CHCl}_3\text{/CH}_3\text{CN}$  (1/1, v/v). ( $\lambda_{\text{exc}} = 300 \text{ nm}$  for PL exp.)

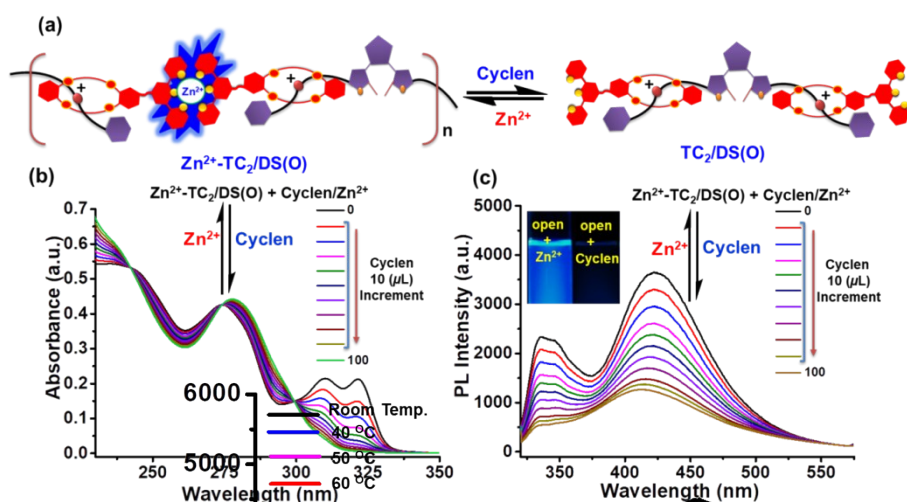

**Fig. S15** (a) Pictorial demonstration of the dis-assembly/re-assembly in

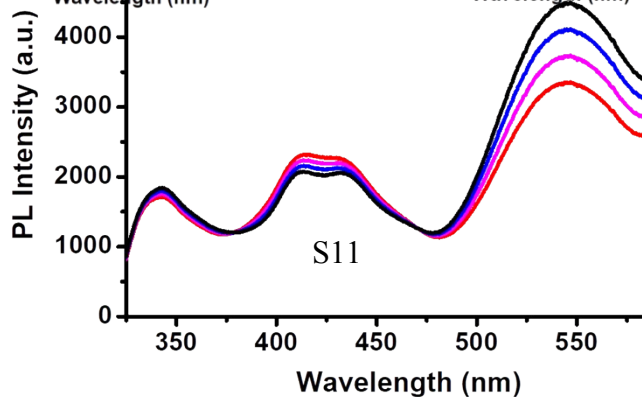

supramolecular polymer **Zn<sup>2+</sup>-TC<sub>2</sub>/DS(O)** (1:1) by means of interaction of Cyclen/Zn<sup>2+</sup> in CHCl<sub>3</sub>/CH<sub>3</sub>CN (1/1, v/v). (b) UV/Vis spectral changes of **Zn<sup>2+</sup>-TC<sub>2</sub>/DS(O)** upon the addition of cyclen (0 to 100 μL) and Zn(OTf)<sub>2</sub> in CHCl<sub>3</sub>/CH<sub>3</sub>CN (1/1, v/v). (c) PL spectral changes of **Zn<sup>2+</sup>-TC<sub>2</sub>/DS(O)** upon the addition of cyclen (0 to 100 μL) and Zn(OTf)<sub>2</sub> in CHCl<sub>3</sub>/CH<sub>3</sub>CN (1/1, v/v). Insets: photoimages of **Zn<sup>2+</sup>-TC<sub>2</sub>/DS(O)** in the absence and presence of cyclen (0 and 100 μL). (λ<sub>ex</sub> = 300 nm for PL exp.)

**Fig. S16** Temperature dependent PL spectra of supramolecular polymer **Zn<sup>2+</sup>-TC<sub>2</sub>/DS(C)** in CHCl<sub>3</sub>/CH<sub>3</sub>CN (1/1, v/v) solution (1 mM) within the temperature range of 40-60 °C. (λ<sub>ex</sub> = 300 nm.)

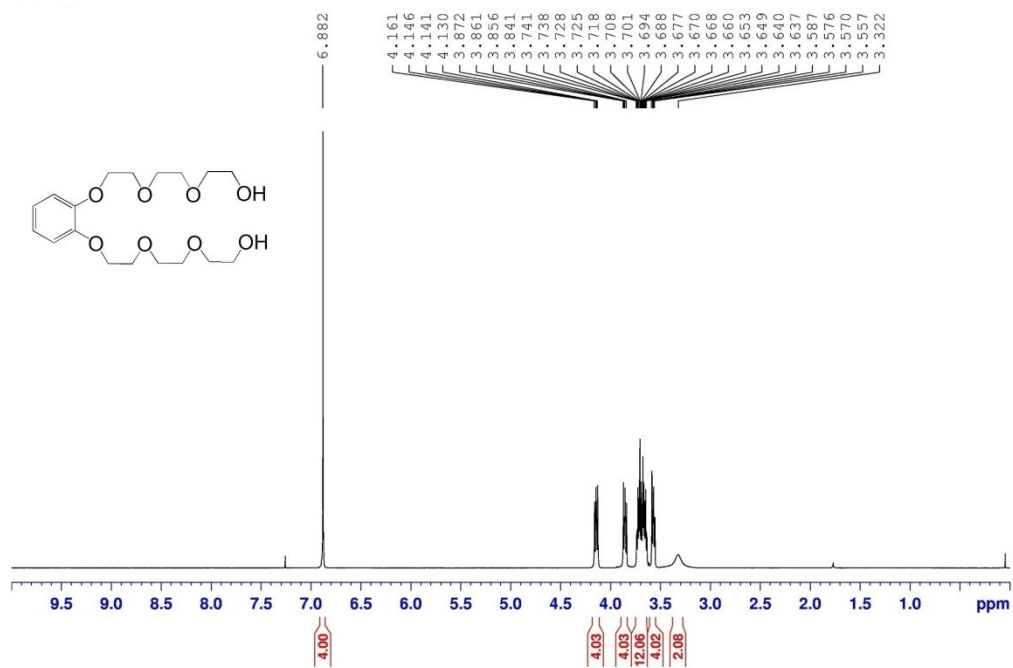

Fig. S17.1 <sup>1</sup>H-NMR of intermediate 1.

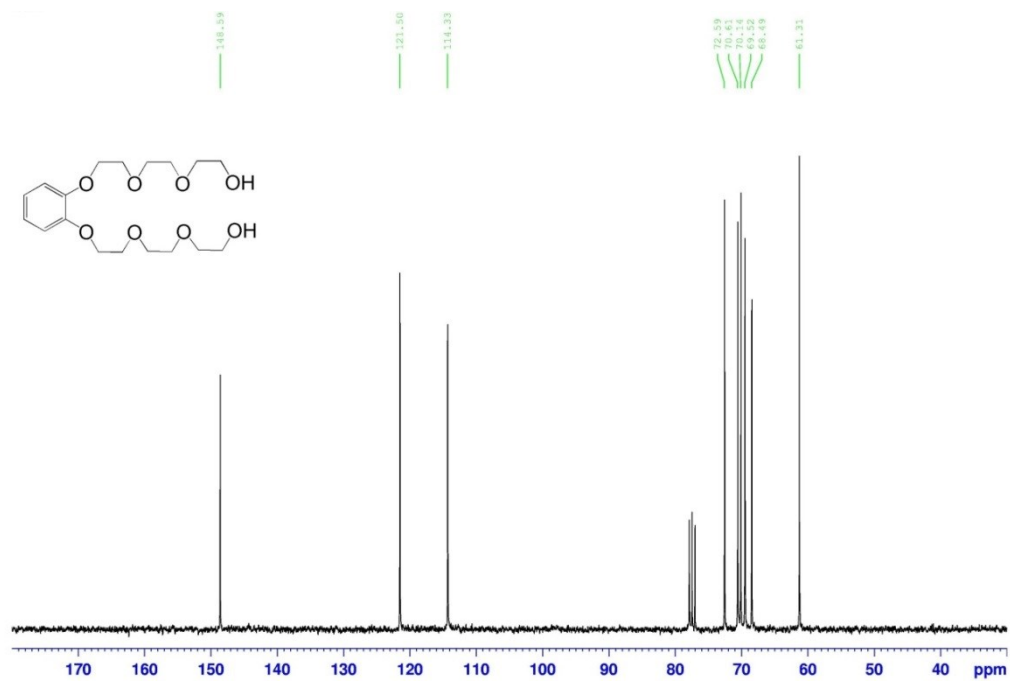

Fig. S17.2 <sup>13</sup>C-NMR of intermediate 1.



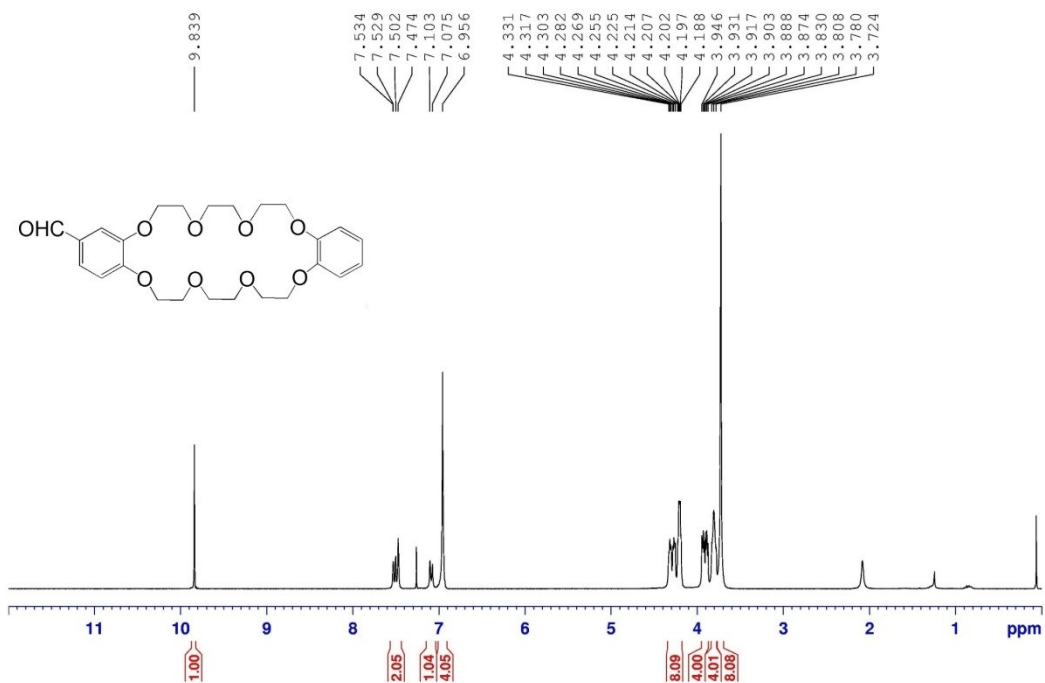

Fig. S19.1 <sup>1</sup>H-NMR of intermediate 3.

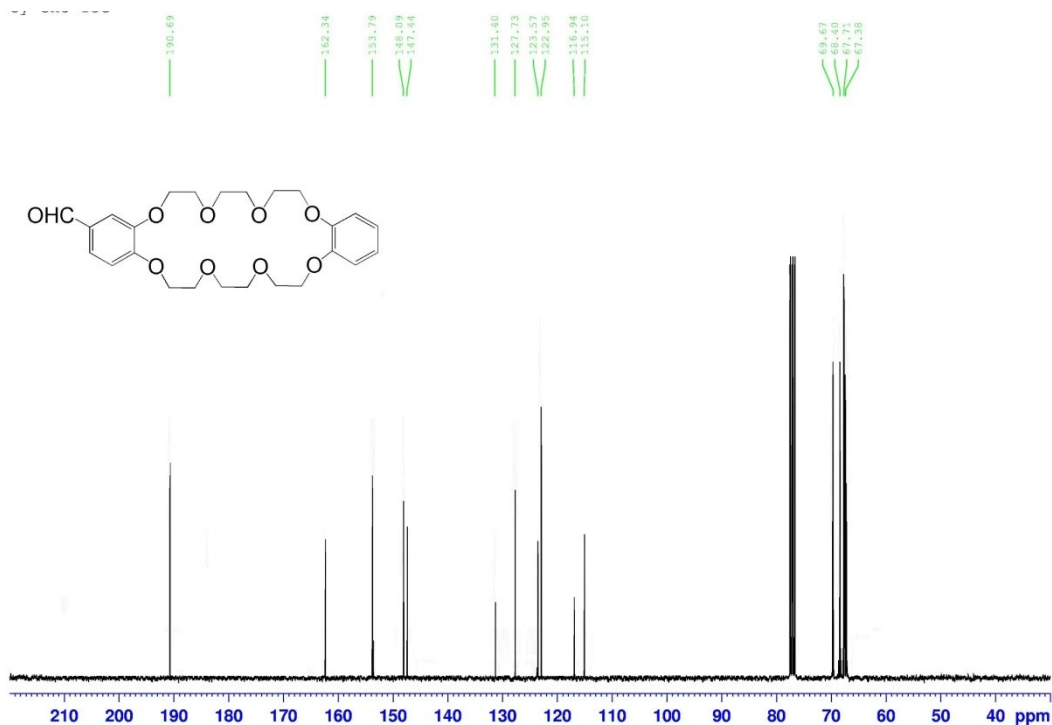

Fig. S19.2 <sup>13</sup>C-NMR of intermediate 3.

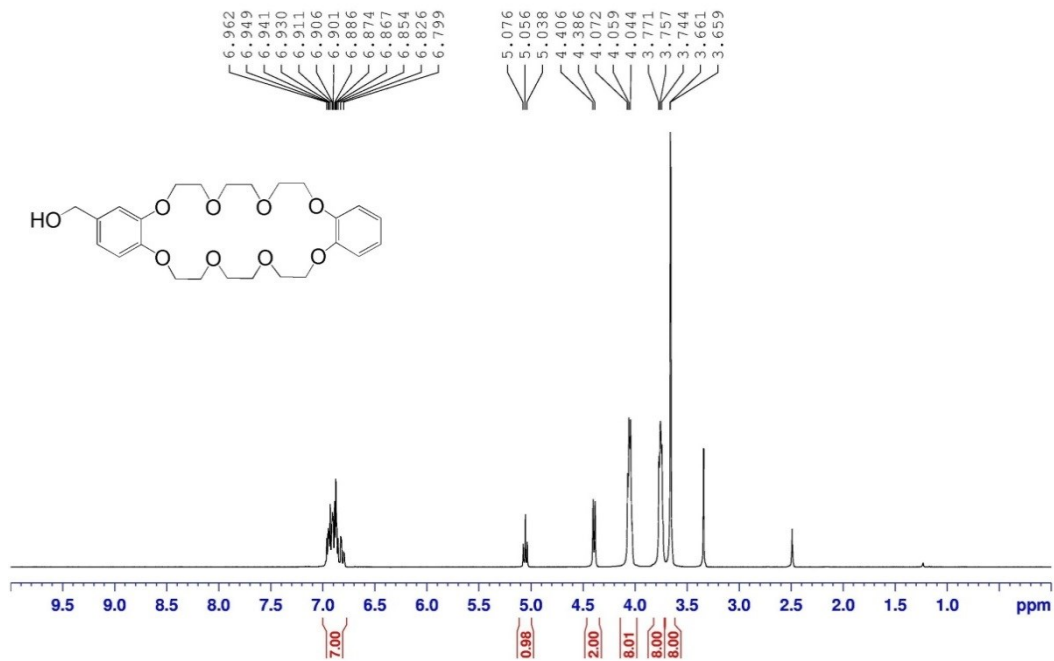

Fig. S20.1 <sup>1</sup>H-NMR of intermediate 4.

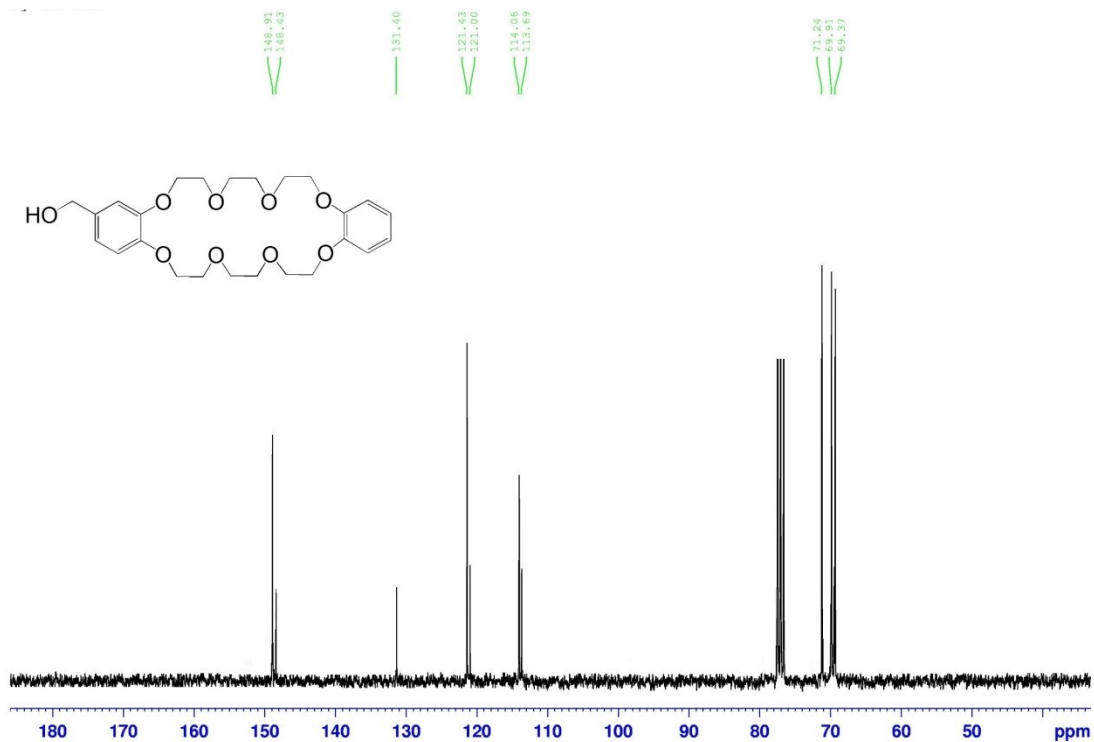

Fig. S20.2 <sup>13</sup>C-NMR of intermediate 4.





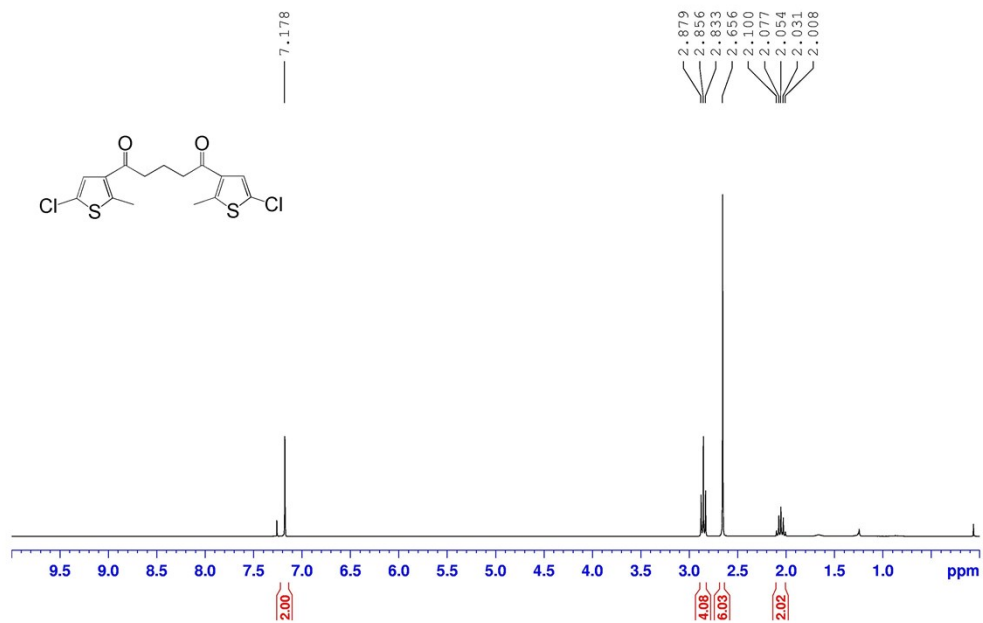

Fig. S22.1 <sup>1</sup>H-NMR of intermediate 5.

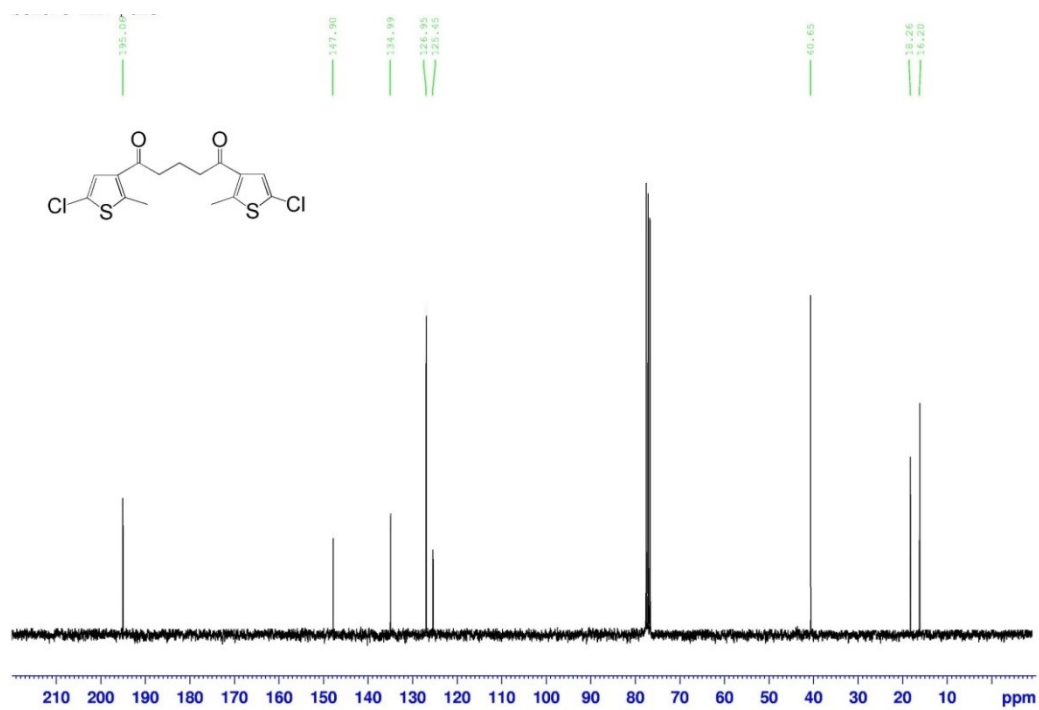

Fig. S22.2 <sup>13</sup>C-NMR of intermediate 5.

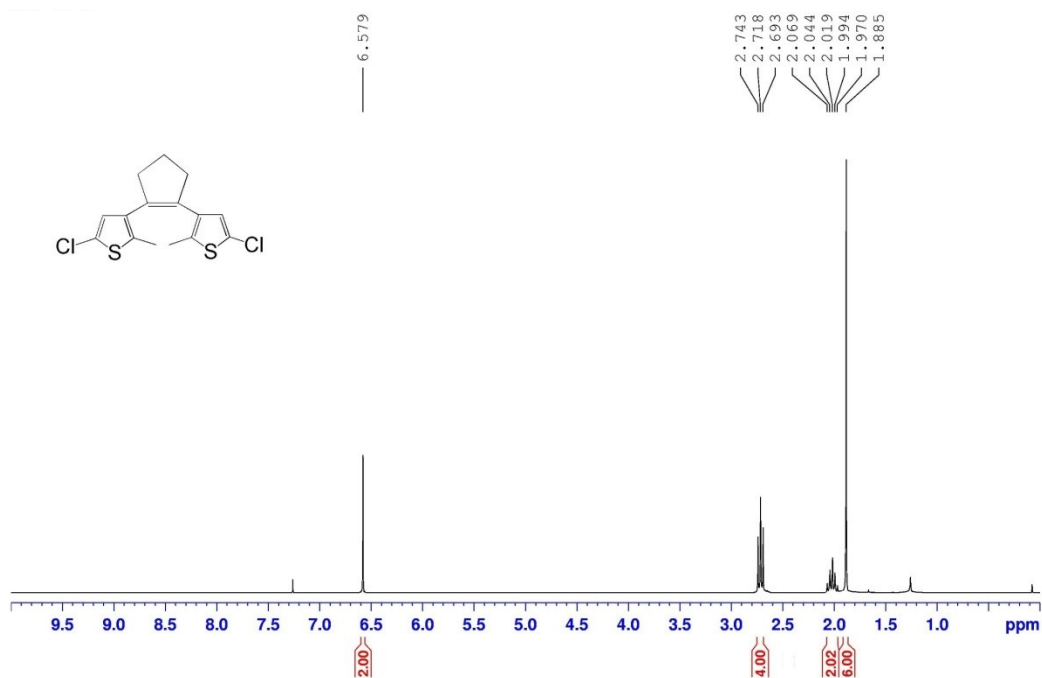

Fig. S23.1  $^1\text{H-NMR}$  of intermediate 6.

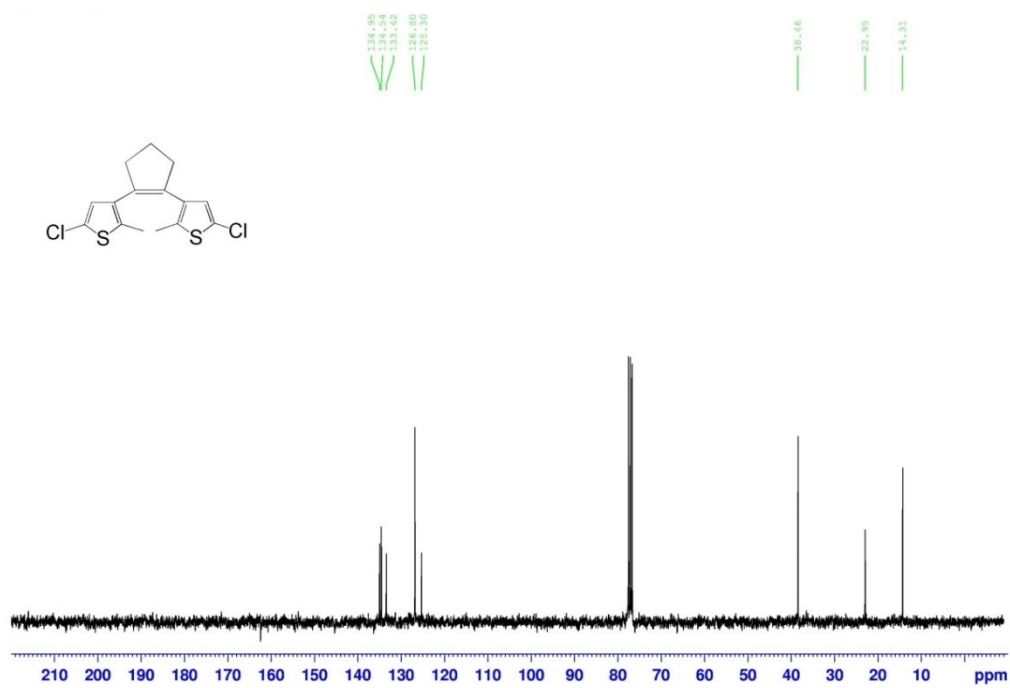

Fig. S23.2  $^{13}\text{C-NMR}$  of intermediate 6.

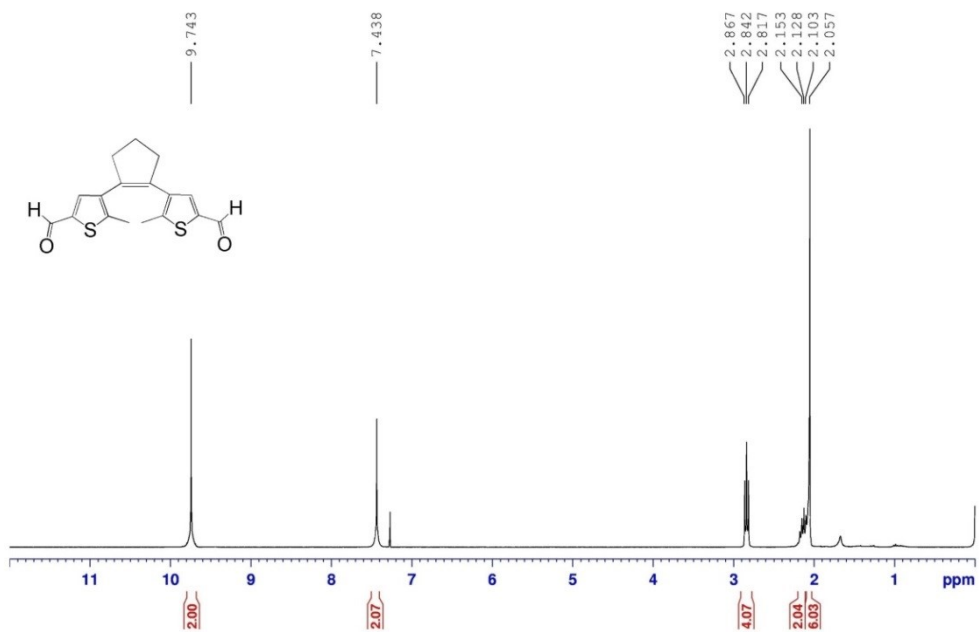

Fig. S24.1 <sup>1</sup>H-NMR of intermediate 7.

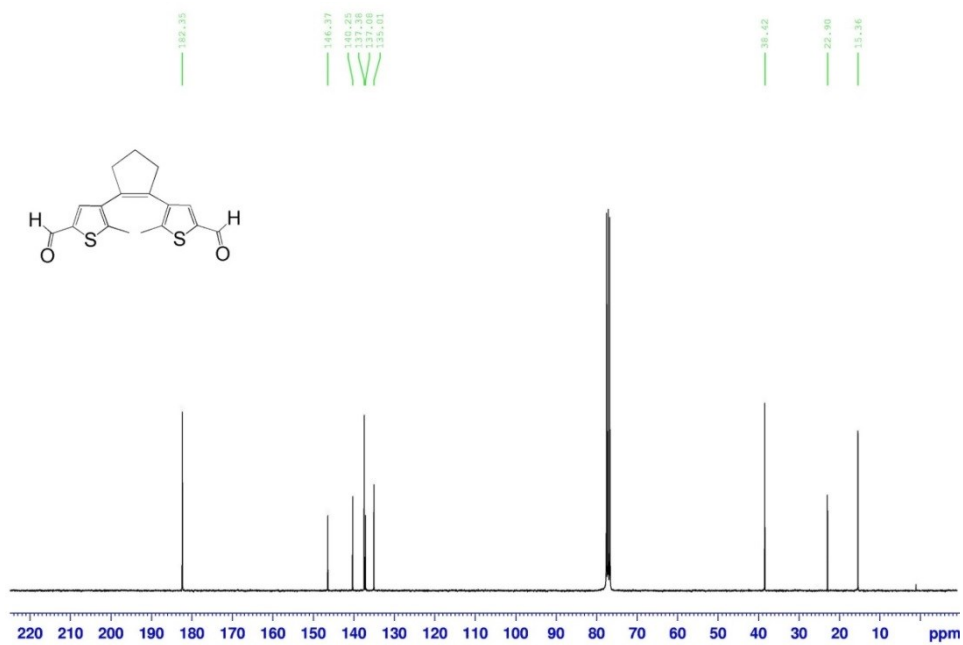

Fig. S24.2 <sup>13</sup>C-NMR of intermediate 7.

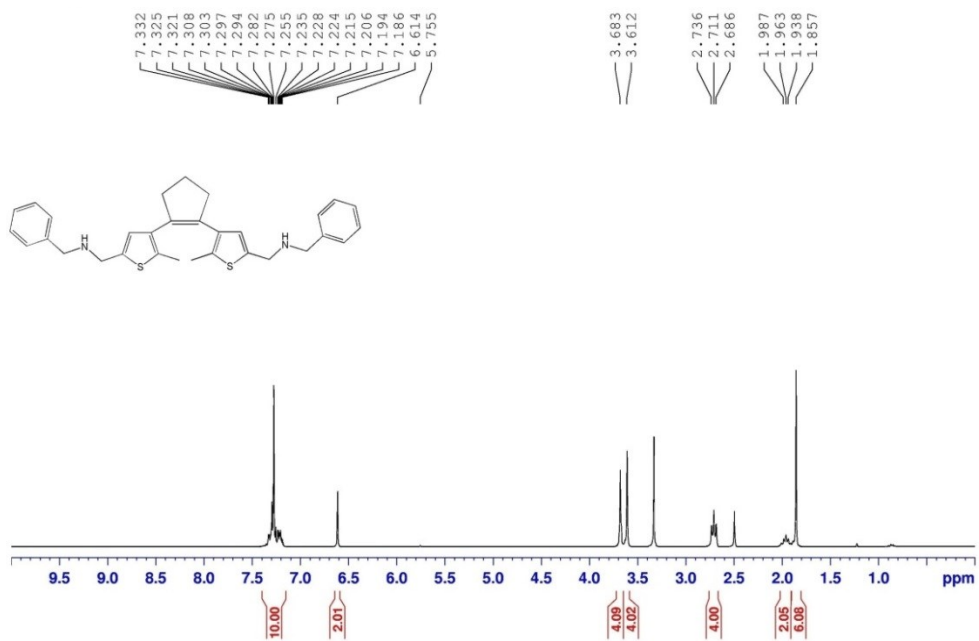

Fig. S25.1  $^1\text{H-NMR}$  of intermediate **8**.

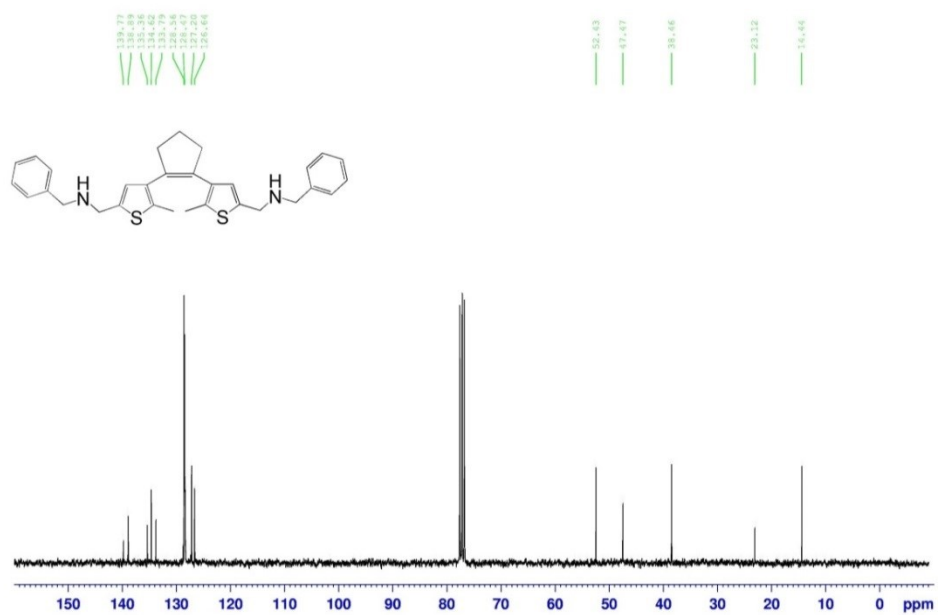

Fig. S25.2  $^{13}\text{C-NMR}$  of intermediate **8**.

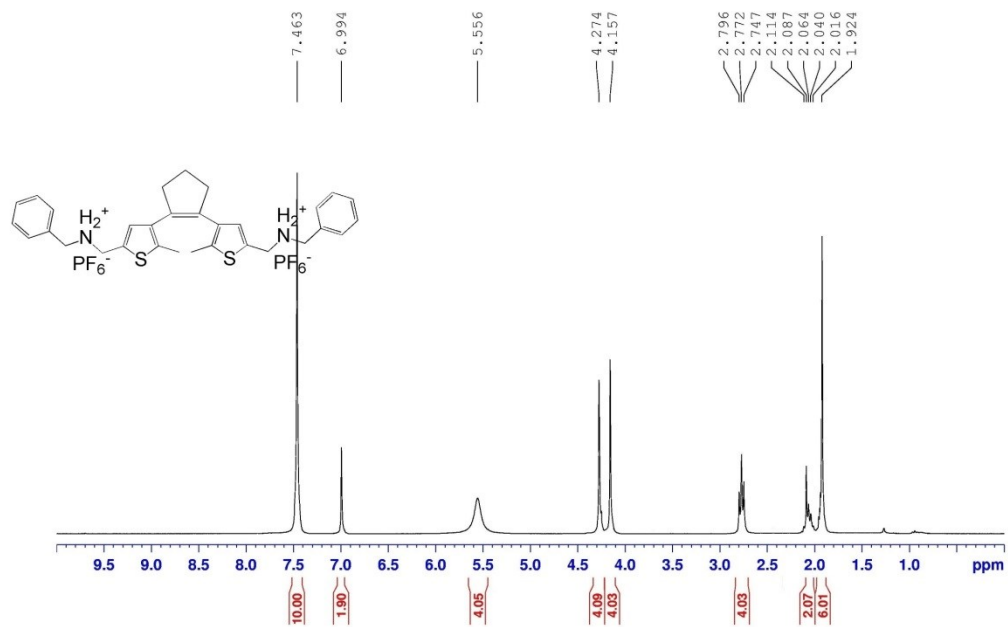

Fig. S26.1  $^1\text{H-NMR}$  of intermediate DS.

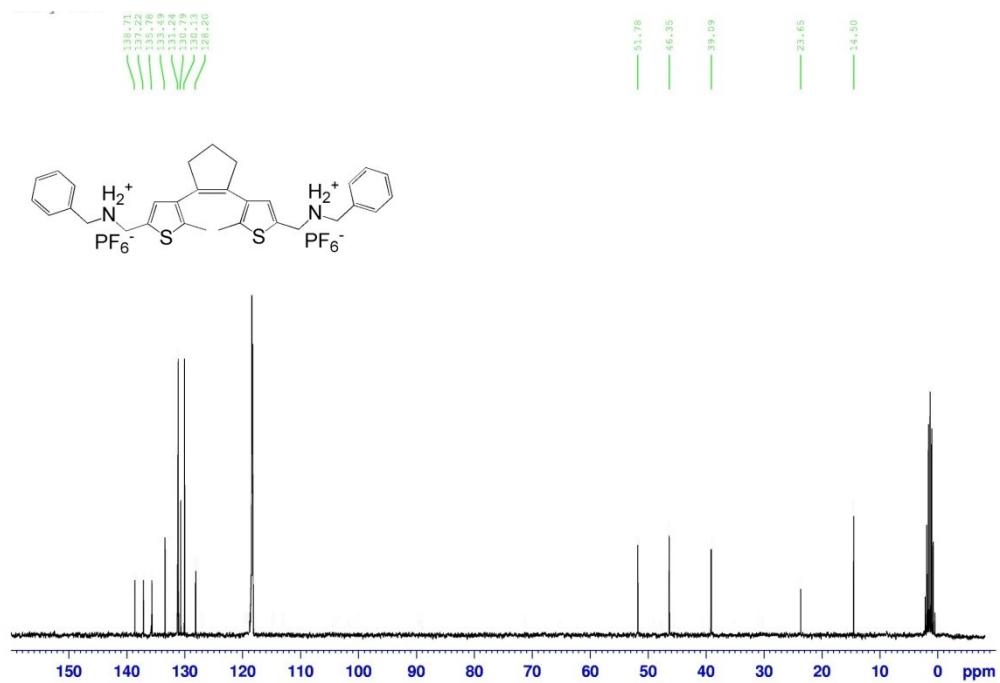

Fig. S26.2  $^{13}\text{C-NMR}$  of intermediate DS.

## Display Report

**Analysis Info**

|               |                                                            |                  |                         |
|---------------|------------------------------------------------------------|------------------|-------------------------|
| Analysis Name | D:\Data\lctu service\data\2017\20170808\20H_BB5_01_15062.d | Acquisition Date | 8/8/2017 10:44:40 AM    |
| Method        | Small molecule.m                                           | Operator         | NCTU                    |
| Sample Name   | 20H                                                        | Instrument       | Impact HD 1819696.00164 |
| Comment       |                                                            |                  |                         |

**Acquisition Parameter**

|             |          |                      |          |                  |           |
|-------------|----------|----------------------|----------|------------------|-----------|
| Source Type | ESI      | Ion Polarity         | Positive | Set Nebulizer    | 1.0 Bar   |
| Focus       | Active   | Set Capillary        | 4500 V   | Set Dry Heater   | 200 °C    |
| Scan Begin  | 50 m/z   | Set End Plate Offset | -500 V   | Set Dry Gas      | 6.0 l/min |
| Scan End    | 1500 m/z | Set Charging Voltage | 2000 V   | Set Divert Valve | Waste     |
|             |          | Set Corona           | 0 nA     | Set APCI Heater  | 0 °C      |

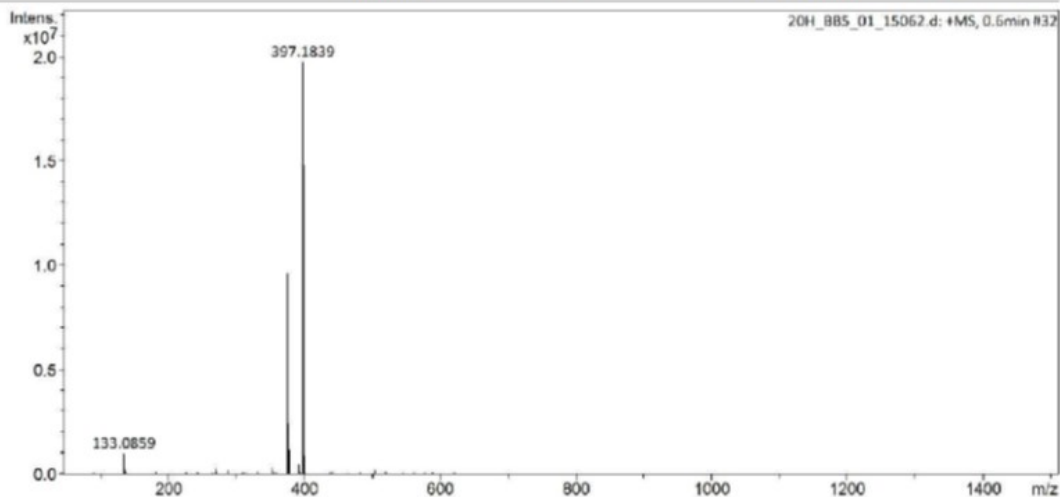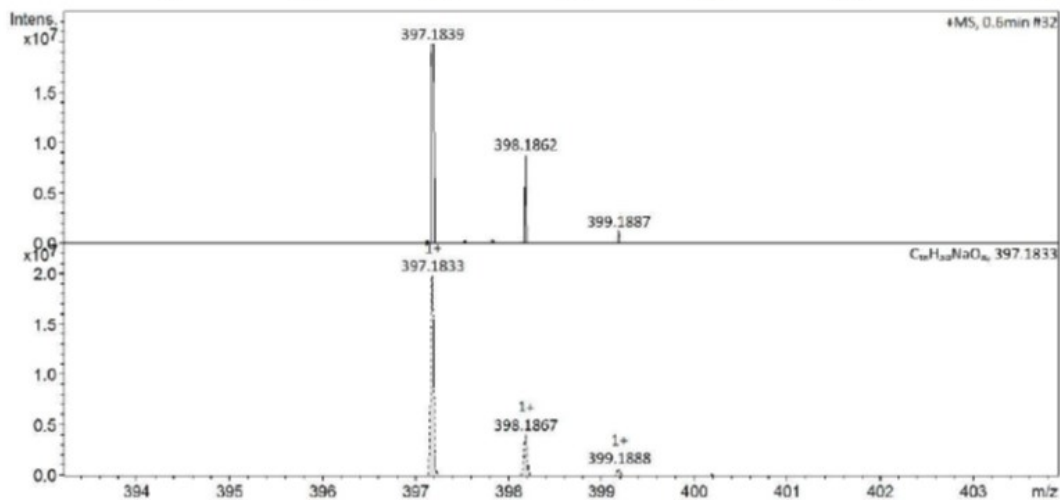

## Display Report

| Meas. m/z | # | Ion Formula                                      | m/z      | err [ppm] | mSigma | # Sigma | Score  | rdb | e <sup>-</sup> Conf | N-Rule | Adduct |
|-----------|---|--------------------------------------------------|----------|-----------|--------|---------|--------|-----|---------------------|--------|--------|
| 397.1839  | 1 | C <sub>18</sub> H <sub>30</sub> NaO <sub>8</sub> | 397.1833 | -1.6      | 121.9  | 1       | 100.00 | 3.5 | even                | ok     | M+Na   |

Fig. S27 HRMS (ESI) data of intermediate 1.

## Display Report

|                      |                                                            |                  |                      |               |
|----------------------|------------------------------------------------------------|------------------|----------------------|---------------|
| <b>Analysis Info</b> |                                                            | Acquisition Date | 8/8/2017 10:48:57 AM |               |
| Analysis Name        | D:\Data\ntu service\data\2017\20170808\tosy_BB6_01_15063.d | Operator         | NCTU                 |               |
| Method               | Small molecule.m                                           | Instrument       | impact HD            | 1819696.00164 |
| Sample Name          | tosy                                                       | Comment          |                      |               |

### Acquisition Parameter

|             |          |                      |          |                  |           |
|-------------|----------|----------------------|----------|------------------|-----------|
| Source Type | ESI      | Ion Polarity         | Positive | Set Nebulizer    | 1.0 Bar   |
| Focus       | Active   | Set Capillary        | 4500 V   | Set Dry Heater   | 200 °C    |
| Scan Begin  | 50 m/z   | Set End Plate Offset | -500 V   | Set Dry Gas      | 6.0 l/min |
| Scan End    | 1500 m/z | Set Charging Voltage | 2000 V   | Set Divert Valve | Waste     |
|             |          | Set Corona           | 0 nA     | Set APCI Heater  | 0 °C      |

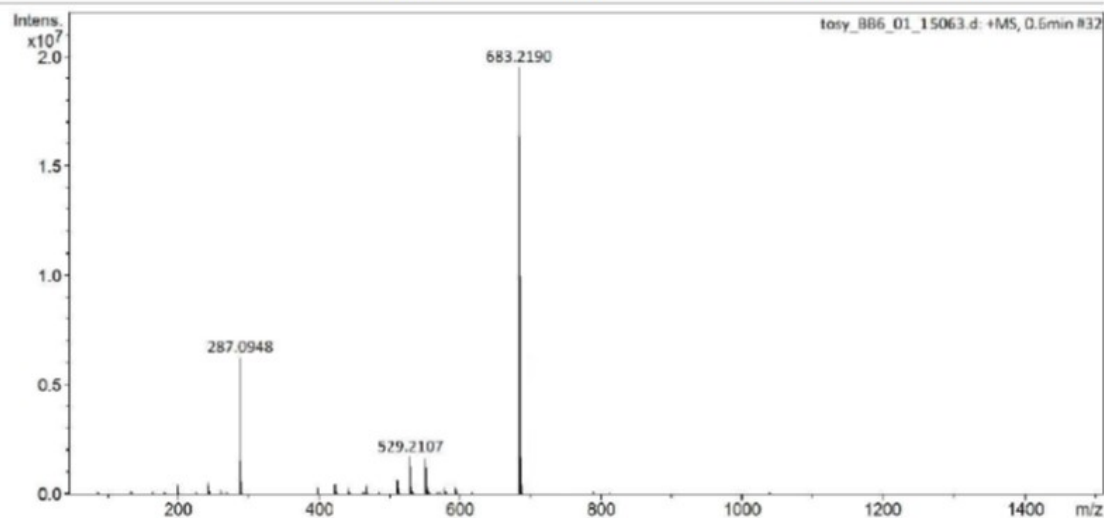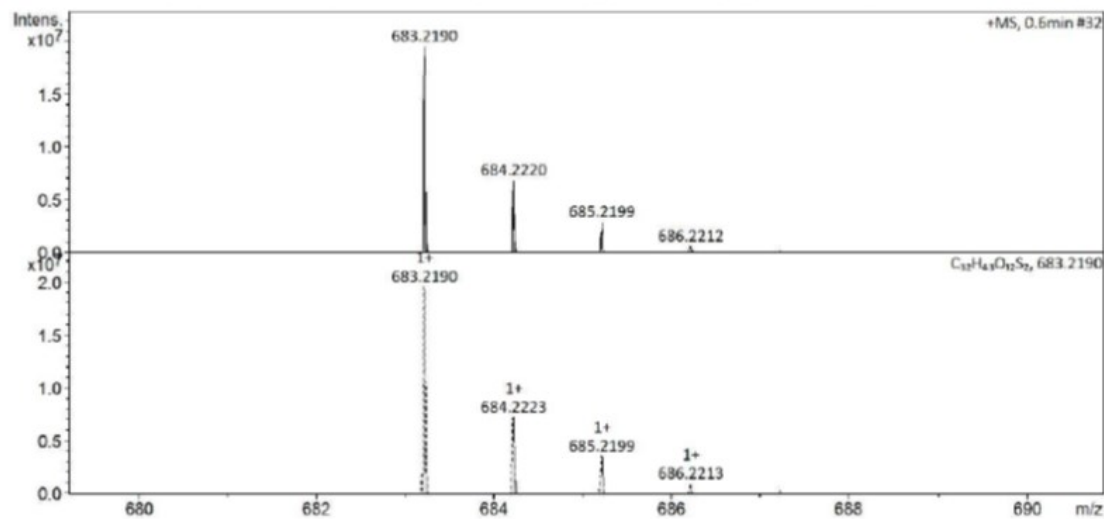

## Display Report

| Meas. m/z | # | Ion Formula                                                    | m/z      | err [ppm] | mSigma | # Sigma | Score  | rdb  | e <sup>-</sup> Conf | N-Rule | Adduct |
|-----------|---|----------------------------------------------------------------|----------|-----------|--------|---------|--------|------|---------------------|--------|--------|
| 683.2190  | 1 | C <sub>32</sub> H <sub>43</sub> O <sub>12</sub> S <sub>2</sub> | 683.2190 | 0.1       | 20.1   | 1       | 100.00 | 11.5 | even                | ok     | M+H    |

**Fig. S28** HRMS (ESI) data of intermediate **2**.



## Display Report

|                      |                                                                |                  |                      |           |               |
|----------------------|----------------------------------------------------------------|------------------|----------------------|-----------|---------------|
| <b>Analysis Info</b> |                                                                | Acquisition Date | 8/8/2017 10:53:12 AM |           |               |
| Analysis Name        | D:\Data\inctu service\data\2017\20170808\Cy-CHO_BB7_01_15064.d |                  | Operator             | NCTU      |               |
| Method               | Small molecule.m                                               |                  | Instrument           | impact HD | 1819696.00164 |
| Sample Name          | Cy-CHO                                                         |                  |                      |           |               |
| Comment              |                                                                |                  |                      |           |               |

|                              |          |                      |          |                  |           |
|------------------------------|----------|----------------------|----------|------------------|-----------|
| <b>Acquisition Parameter</b> |          |                      |          |                  |           |
| Source Type                  | ESI      | Ion Polarity         | Positive | Set Nebulizer    | 1.0 Bar   |
| Focus                        | Active   | Set Capillary        | 4500 V   | Set Dry Heater   | 200 °C    |
| Scan Begin                   | 50 m/z   | Set End Plate Offset | -500 V   | Set Dry Gas      | 6.0 l/min |
| Scan End                     | 1500 m/z | Set Charging Voltage | 2000 V   | Set Divert Valve | Waste     |
|                              |          | Set Corona           | 0 nA     | Set APCI Heater  | 0 °C      |

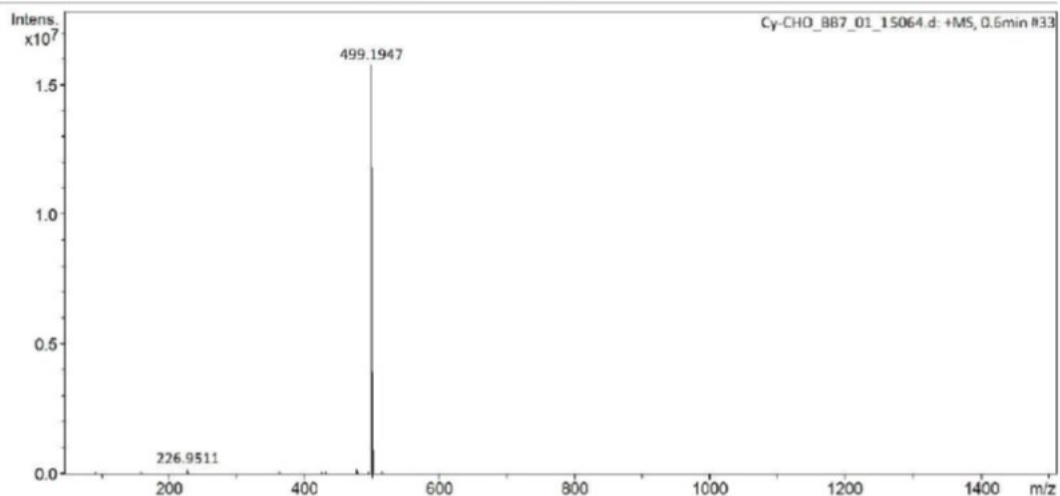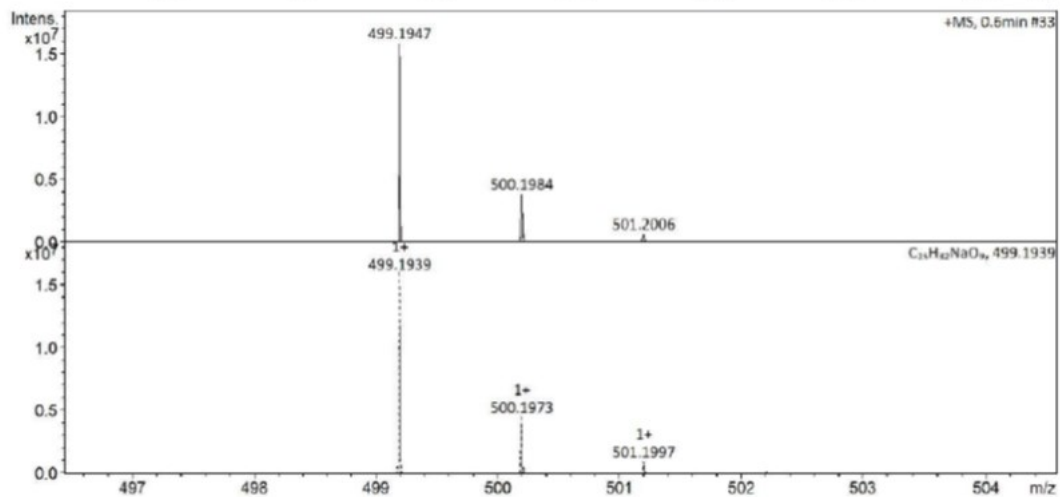

## Display Report

| Meas. m/z | # | Ion Formula                                      | m/z      | err [ppm] | mSigma | # Sigma | Score  | rdB | e <sup>-</sup> Conf | N-Rule | Adduct |
|-----------|---|--------------------------------------------------|----------|-----------|--------|---------|--------|-----|---------------------|--------|--------|
| 499.1947  | 1 | C <sub>25</sub> H <sub>32</sub> NaO <sub>9</sub> | 499.1939 | 1.7       | 19.7   | 1       | 100.00 | 9.5 | even                | ok     | M+Na   |

**Fig. S29** HRMS (ESI) data of intermediate **3**.

## Display Report

### Analysis Info

|               |                                                             |                  |                         |
|---------------|-------------------------------------------------------------|------------------|-------------------------|
| Analysis Name | D:\Data\ntu service\data\2017\20170808\Cy-OH_BB8_01_15065.d | Acquisition Date | 8/8/2017 10:57:28 AM    |
| Method        | Small molecule.m                                            | Operator         | NCTU                    |
| Sample Name   | Cy-OH                                                       | Instrument       | impact HD 1819696.00164 |
| Comment       |                                                             |                  |                         |

### Acquisition Parameter

|             |          |                      |          |                  |           |
|-------------|----------|----------------------|----------|------------------|-----------|
| Source Type | ESI      | Ion Polarity         | Positive | Set Nebulizer    | 1.0 Bar   |
| Focus       | Active   | Set Capillary        | 4500 V   | Set Dry Heater   | 200 °C    |
| Scan Begin  | 50 m/z   | Set End Plate Offset | -500 V   | Set Dry Gas      | 6.0 l/min |
| Scan End    | 1500 m/z | Set Charging Voltage | 2000 V   | Set Divert Valve | Waste     |
|             |          | Set Corona           | 0 nA     | Set APCI Heater  | 0 °C      |

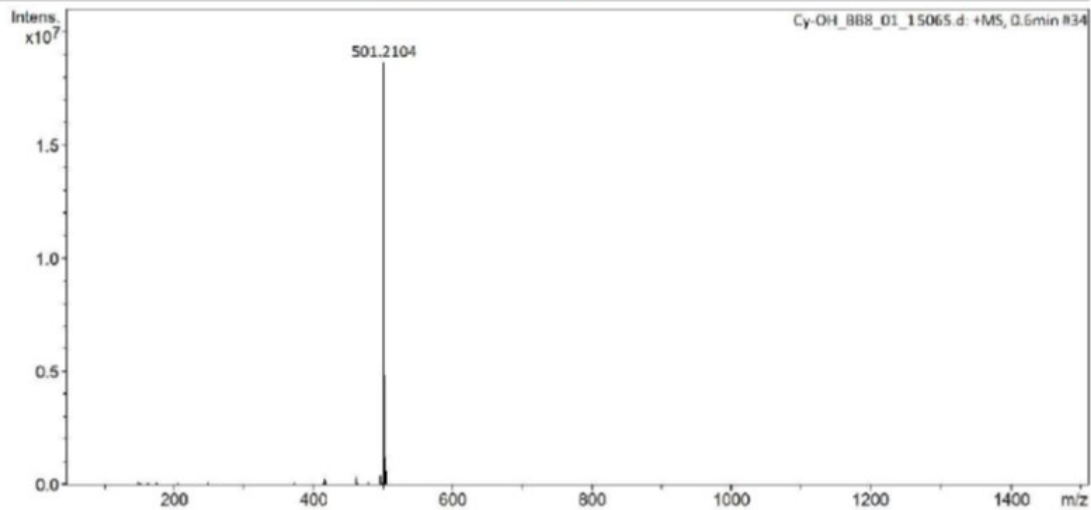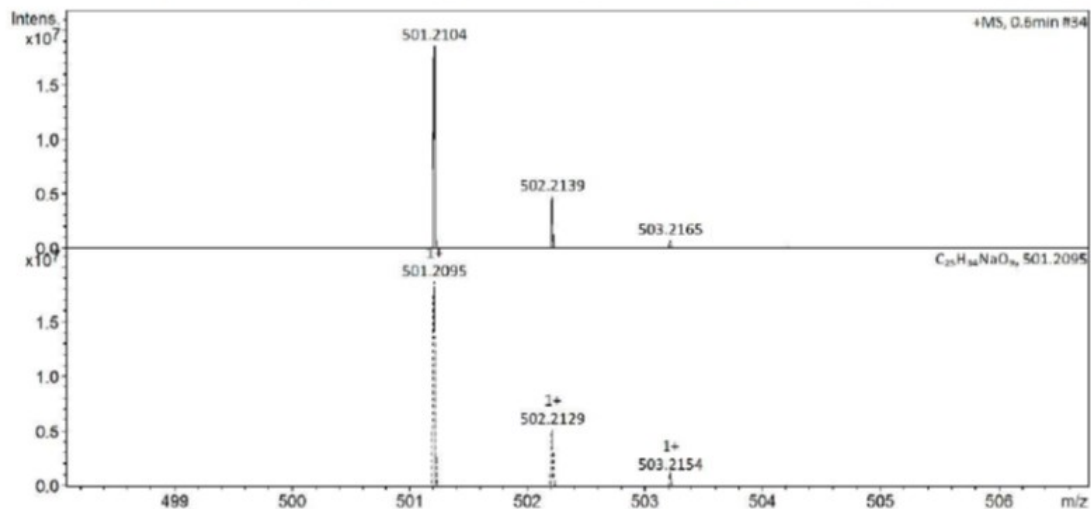

## Display Report

| Meas. m/z | # | Ion Formula                                      | m/z      | err [ppm] | mSigma | # Sigma | Score  | rdb | e <sup>-</sup> Conf | N-Rule | Adduct |
|-----------|---|--------------------------------------------------|----------|-----------|--------|---------|--------|-----|---------------------|--------|--------|
| 501.2104  | 1 | C <sub>25</sub> H <sub>34</sub> NaO <sub>9</sub> | 501.2095 | 1.8       | 10.8   | 1       | 100.00 | 8.5 | even                | ok     | M+Na   |

**Fig. S30** HRMS (ESI) data of intermediate **4**.

## Display Report

**Analysis Info**

|               |                                                                |                  |                         |
|---------------|----------------------------------------------------------------|------------------|-------------------------|
| Analysis Name | D:\Data\inctu service\data\2017\20170505\Cy-tpy_BA5_01_13518.d | Acquisition Date | 5/5/2017 11:35:02 AM    |
| Method        | Small molecule.m                                               | Operator         | NCTU                    |
| Sample Name   | Cy-tpy                                                         | Instrument       | impact HD 1819696.00164 |
| Comment       |                                                                |                  |                         |

**Acquisition Parameter**

|             |          |                      |          |                  |           |
|-------------|----------|----------------------|----------|------------------|-----------|
| Source Type | ESI      | Ion Polarity         | Positive | Set Nebulizer    | 1.0 Bar   |
| Focus       | Active   | Set Capillary        | 4500 V   | Set Dry Heater   | 200 °C    |
| Scan Begin  | 50 m/z   | Set End Plate Offset | -500 V   | Set Dry Gas      | 6.0 l/min |
| Scan End    | 1500 m/z | Set Charging Voltage | 2000 V   | Set Divert Valve | Waste     |
|             |          | Set Corona           | 0 nA     | Set APCI Heater  | 0 °C      |

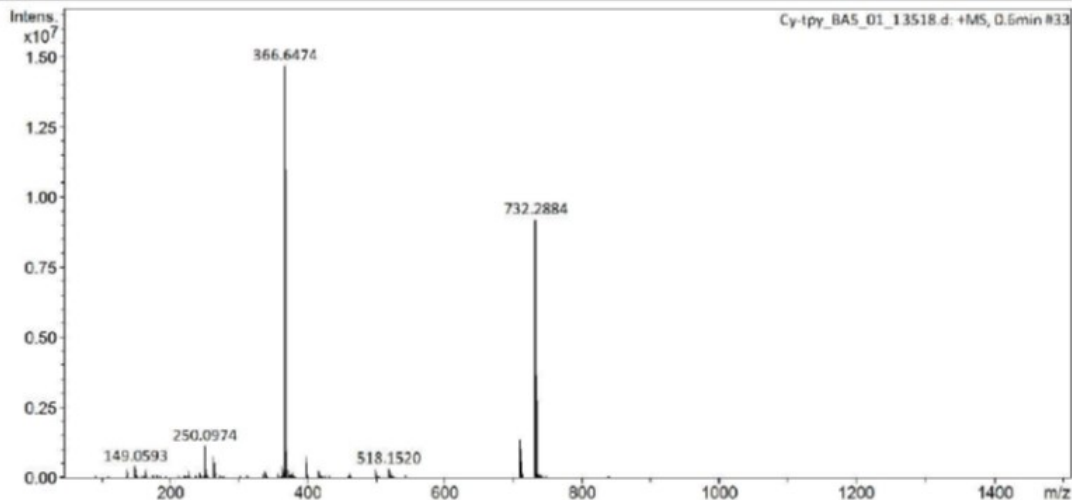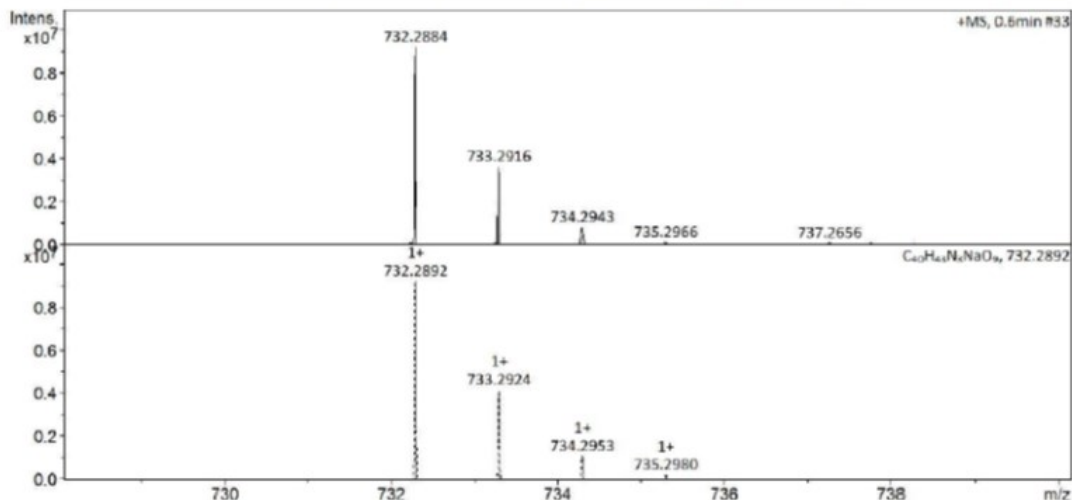

## Display Report

| Meas. m/z | # | Ion Formula                                                     | m/z      | err [ppm] | mSigma | # Sigma | Score  | rdb  | e <sup>-</sup> Conf | N-Rule | Adduct |
|-----------|---|-----------------------------------------------------------------|----------|-----------|--------|---------|--------|------|---------------------|--------|--------|
| 732.2884  | 1 | C <sub>40</sub> H <sub>43</sub> N <sub>3</sub> NaO <sub>9</sub> | 732.2892 | 1.0       | 27.9   | 1       | 100.00 | 20.5 | even                | ok     | M+Na   |

**Fig. S31** HRMS (ESI) data of intermediate TC.

## Display Report

**Analysis Info**

|               |                                                                      |                  |                         |
|---------------|----------------------------------------------------------------------|------------------|-------------------------|
| Analysis Name | D:\Data\Inctu service\data\2016\20160923\NH-diaryl-NH_RB1_01_11119.d | Acquisition Date | 9/23/2016 9:52:44 AM    |
| Method        | Small molecule.m                                                     | Operator         | NCTU                    |
| Sample Name   | NH-diaryl-NH                                                         | Instrument       | impact HD 1819696.00164 |
| Comment       |                                                                      |                  |                         |

**Acquisition Parameter**

|             |          |                      |          |                  |           |
|-------------|----------|----------------------|----------|------------------|-----------|
| Source Type | ESI      | Ion Polarity         | Positive | Set Nebulizer    | 1.0 Bar   |
| Focus       | Active   | Set Capillary        | 4500 V   | Set Dry Heater   | 200 °C    |
| Scan Begin  | 50 m/z   | Set End Plate Offset | -500 V   | Set Dry Gas      | 6.0 l/min |
| Scan End    | 1500 m/z | Set Charging Voltage | 2000 V   | Set Divert Valve | Waste     |
|             |          | Set Corona           | 0 nA     | Set APCI Heater  | 0 °C      |

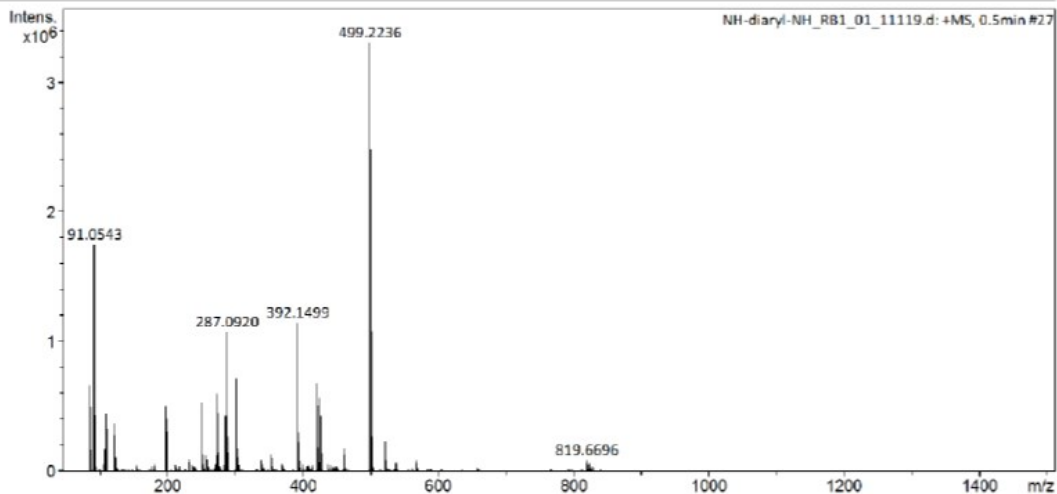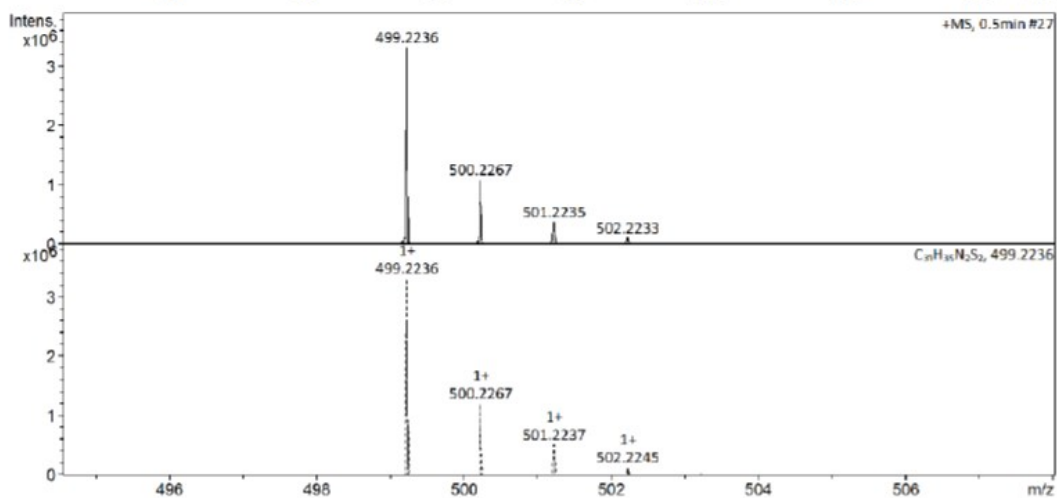

## Display Report

| Meas. m/z | # | Ion Formula                                                   | m/z      | err [ppm] | mSigma | # Sigma | Score  | rdB  | e <sup>-</sup> Conf | N-Rule | Adduct |
|-----------|---|---------------------------------------------------------------|----------|-----------|--------|---------|--------|------|---------------------|--------|--------|
| 499.2236  | 1 | C <sub>31</sub> H <sub>35</sub> N <sub>2</sub> S <sub>2</sub> | 499.2236 | 0.0       | 24.9   | 2       | 100.00 | 15.5 | even                | ok     | M+H    |

**Fig. S32** HRMS (ESI) data of intermediate **8**.

國立中興大學研發處貴重儀器使用中心  
元素分析儀服務報告書

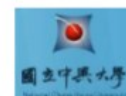

說明：

1. 本實驗數據為檢測結果，不得用於商業廣告、認證及法律証據使用。(This result is for academic use only, not to be used for any judicial or commercial advertising purpose.)
2. 儀器負責人：鄭政峯 教授 檢測技術員：陳宜綱。  
(Instrument Director : Prof. Jen-Fon Jen Operator : I-Chuan Chen)

樣品資訊：

|            |                     |      |                  |
|------------|---------------------|------|------------------|
| Web NO     | SEA0001002017040171 | DATE |                  |
| Department | 交大材料所               | 收件日  | 2017.07.21       |
| Supervisor | 林宏洲                 | 分析日  | 2017.08.04 (NCH) |
| User name  | 蕭智中                 |      | 2017.08.04 (O)   |
|            |                     |      | 2017.08.04 (S)   |

分析結果：

| Sample code | Weight(mg) | N % | C %   | H %  | O %   | S %  | Repeat | Charge   |
|-------------|------------|-----|-------|------|-------|------|--------|----------|
| 2OH         | 2.023      |     | 57.70 | 8.08 | 34.22 |      | 1      | \$ 3,000 |
|             | 2.075      |     | 57.79 | 8.11 | 34.10 |      |        |          |
| 推測值         |            |     | 57.74 | 8.08 | 34.18 |      |        |          |
| Tosy        | 2.285      |     | 56.31 | 6.20 | 28.15 | 9.34 | 1      | \$ 3,000 |
|             | 2.309      |     | 56.33 | 6.19 | 28.08 | 9.40 |        |          |
| 推測值         |            |     | 56.29 | 6.20 | 28.12 | 9.39 |        |          |
| Cy-CHO      | 2.403      |     | 62.79 | 6.79 | 30.24 |      | 1      | \$ 3,000 |
|             | 2.414      |     | 63.05 | 6.75 | 30.20 |      |        |          |
| 推測值         |            |     | 63.01 | 6.77 | 30.22 |      |        |          |
| Cy-OH       | 2.678      |     | 62.80 | 7.14 | 30.06 |      | 1      | \$ 3,000 |
|             | 2.691      |     | 62.73 | 7.17 | 30.10 |      |        |          |
| 推測值         |            |     | 62.75 | 7.16 | 30.09 |      |        |          |

備註：

使用儀器：Elementar vario CUBE(CHN-OS Rapid, German), Accuracy: 0.1%, Precision: 0.2%

| 標準品             | N %   | C %   | H %  | O %   | S %   |
|-----------------|-------|-------|------|-------|-------|
| ★ Acetanilid    | 10.36 | 71.09 | 6.71 |       |       |
| ★ Benzoic acid  |       |       |      | 26.20 |       |
| ★ Sulfamic acid | 8.09  | 41.60 | 4.07 |       | 18.50 |
| Daily standard  | 10.40 | 71.13 | 6.73 |       |       |
| Daily standard  |       |       |      | 26.21 |       |
| Daily standard  | 8.11  | 41.62 | 4.11 |       | 18.43 |

Fig. S33 Elementary analysis (EA) data of intermediates 1, 2, 3, and 4.

國立中興大學研發處貴重儀器使用中心  
元素分析儀服務報告書

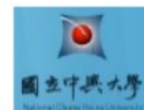

說明：

1. 本實驗數據為檢測結果，不得用於商業廣告、認證及法律証據使用。(This result is for academic use only, not to be used for any judicial or commercial advertising purpose.)
2. 儀器負責人：鄭政峯 教授 檢測技術員：陳宜絹。  
(Instrument Director : Prof. Jen-Fon Jen Operator : I-Chuan Chen)

樣品資訊：

|            |                     |      |                  |
|------------|---------------------|------|------------------|
| Web NO     | SEA0001002017040230 | DATE |                  |
| Department | 交大材料所               | 收件日  | 2017.08.10       |
| Supervisor | 林宏洲                 | 分析日  | 2017.08.14 (NCH) |
| User name  | 蕭智中                 |      | 2017.08.14 (O)   |
|            |                     |      | 2017.08.14 (S)   |

分析結果：

| Sample code | Weight(mg) | N % | C %   | H %  | O %  | S %   | Repeat | Charge   |
|-------------|------------|-----|-------|------|------|-------|--------|----------|
| Diary-amine | 2.410      |     | 74.66 | 6.88 | 5.59 | 12.87 | 1      | \$ 3,000 |
|             | 2.423      |     | 74.66 | 6.90 | 5.59 | 12.85 |        |          |
| 推測值         |            |     | 74.65 | 6.87 | 5.62 | 12.86 |        |          |

備註：

使用儀器：Elementar vario CUBE( CHN-OS Rapid, German), Accuracy: 0.1%, Precision: 0.2%

|   | 標準品             | N %   | C %   | H %  | O %   | S %   |
|---|-----------------|-------|-------|------|-------|-------|
| ★ | Acetanilid      | 10.36 | 71.09 | 6.71 |       |       |
| ★ | Benzoic acid    |       |       |      | 26.20 |       |
| ★ | Sulfanilic acid | 8.09  | 41.60 | 4.07 |       | 18.50 |
|   | Daily standard  | 10.40 | 71.13 | 6.73 |       |       |
|   | Daily standard  |       |       |      | 26.21 |       |
|   | Daily standard  | 8.11  | 41.62 | 4.11 |       | 18.43 |

Fig. S34 Elementary analysis (EA) data of intermediate 8.

國立中興大學研發處貴重儀器使用中心  
元素分析儀服務報告書

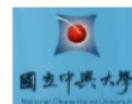

說明：

- 1.本實驗數據為檢測結果，不得用於商業廣告、認證及法律証據使用。(This result is for academic use only, not to be used for any judicial or commercial advertising purpose.)
- 2.儀器負責人：鄭政峯 教授 檢測技術員：陳宜絹。  
(Instrument Director : Prof. Jen-Fon Jen Operator : I-Chuan Chen)

樣品資訊：

|              |                     |       |                  |
|--------------|---------------------|-------|------------------|
| Web NO       | SEA0001002017040129 | DATE  |                  |
| Department : | 交大材料所               | 收件日 : | 2017.05.03       |
| Supervisor : | 林宏洲                 | 分析日 : | 2017.05.04 (NCH) |
| User name :  | 蕭智中                 |       | 2017.05.05 (O)   |
|              |                     |       | 2017.05.12 (S)   |

分析結果：

| Sample code | Weight(mg) | N %  | C %   | H %  | O %   | S %  | Repeat | Charge   |
|-------------|------------|------|-------|------|-------|------|--------|----------|
| Diary-salt  | 2.019      | 3.55 | 47.10 | 4.60 |       | 8.11 | 1      | \$ 3,000 |
|             | 2.025      | 3.53 | 47.08 | 4.61 |       | 8.12 |        |          |
| 推測值         |            | 3.54 | 47.09 | 4.59 |       | 8.11 |        |          |
| Cy-tpy      | 2.345      | 5.92 | 67.64 | 6.13 | 20.31 |      | 1      | \$ 3,000 |
|             | 2.339      | 5.94 | 67.64 | 6.10 | 20.32 |      |        |          |
| 推測值         |            | 5.92 | 67.69 | 6.11 | 20.29 |      |        |          |

備註：

使用儀器：Elementar vario CUBE( CHN-OS Rapid, German), Accuracy: 0.1%, Precision: 0.2%

|   | 標準品             | N %   | C %   | H %  | O %   | S %   |
|---|-----------------|-------|-------|------|-------|-------|
| ★ | Acetanilid      | 10.36 | 71.09 | 6.71 |       |       |
| ★ | Benzoic acid    |       |       |      | 26.20 |       |
| ★ | Sulfanilic acid | 8.09  | 41.60 | 4.07 |       | 18.50 |
|   | Daily standard  | 10.40 | 71.13 | 6.73 |       |       |
|   | Daily standard  |       |       |      | 26.21 |       |
|   | Daily standard  | 8.11  | 41.62 | 4.11 |       | 18.43 |

Fig. S35 Elementary analysis (EA) data of intermediates DS and TC.
